# Supplementary material for: The Yeast Rab GTPase Ypt1 Modulates Unfolded Protein Response Dynamics by Regulating the Stability of HAC1 RNA
Source: PLoS Genet. 2012 Jul 26;8(7):e1002862. doi: 10.1371/journal.pgen.1002862 (PMC3406009; doi:10.1371/journal.pgen.1002862)
Supplement: Table S1 — Yeast strains used and annotated functions for proteins discussed in the paper. (XLSX) [file pgen.1002862.s008.xlsx]

## Sheet: README
(1) "Yeast strains" tab- described genotypes of strains used in this study
(2) "Proteins and annotated function" tab- described relevant proteins and their corresponding cellular function as well as
any known roles they play in UPR dynamics

## Sheet: Yeast Strains
Strain	Genotype	Source
RSY976	MATa ura3-52 ypt1-3	C.Barlowe
RSY255	MATa ura3-52 leu2-3,112	C.Barlowe
NTY9	MATa his3Δ1 leu2Δ0 uraΔ0 met15Δ0 ire1:KanMX (GAL1/10 URA3 2u-GST-YPT1)	this study
NTY10	MATa his3Δ1 leu2Δ0 uraΔ0 met15Δ0 ada5:KanMX (GAL1/10 URA3 2u-GST-YPT1)	this study
NTY27	MATa his3Δ1 leu2Δ0 uraΔ0 met15Δ0 (CEN LEU HAC1p-GFP-ACT1 3'UTR)	this study
NTY28	MATa his3Δ1 leu2Δ0 uraΔ0 met15Δ0 ypt1:KanMX (CEN LEU HAC1p-GFP-ACT1 3'UTR)	this study
NTY30	MATa ura3-52 ypt1-3 (GAL1/10 URA3 2u-GST-YPT1)	this study
NTY31	MATa ura3-52 leu2-3,112 (GAL1/10 URA3 2u-GST-YPT1)	this study
NTY37	MATa his3Δ1 leu2Δ0 met15Δ0 hac1::KanMX URA3::hac1-G1137C	this study
NTY38	MATa his3Δ1 leu2Δ0 met15Δ0 ada5::KanMX URA3::hac1-G1137C	this study
NTY39	MATa his3Δ1 leu2Δ0 met15Δ0 ire1:KanMX URA3::hac1-G1137C	this study
NTY41	MATa his3Δ1 leu2Δ0 uraΔ0 met15Δ0 HA-ire1::KanMX (GAL1/10 URA3 2u-GST-YPT1)	this study
NTY42	MATa his3Δ1 leu2Δ0 uraΔ0 met15Δ0 HA-mrs6:KanMX (GAL1/10 URA3 2u-GST-YPT1)	this study
NTY43	MATa his3Δ1 leu2Δ0 uraΔ0 met15Δ0 HA-ada5:KanMX (GAL1/10 URA3 2u-GST-YPT1)	this study
NTY44	MATa his3Δ1 leu2Δ0 uraΔ0 met15Δ0 HA-puf5:KanMX (GAL1/10 URA3 2u-GST-YPT1)	this study

## Sheet: Proteins and Annotated Function
Protein	Annotated function	Role in UPR
Ire1	Ser-Thr kinase; cleaves HAC1u	Cleave HAC1uexon-intron junctions
Rlg1	tRNA ligase	Joins cleaved HAC1u exons to generate HAC1i
Ypt1	Rab GTPase; regulates ER-to-Golgi transport	No direct role known prior to this study
Ypt32	Rab GTPase; regulates intra-Golgi and post-Golgi transport	No direct role known prior to this study
Ypt7	Rab GTPase; regulates Golgi-to-vacuole transport	No direct role known prior to this study
Rho3	Rho/Rac family GTPase; establishment of cell polarity	No direct role known prior to this study
Gis2	Translational activator of IRES-containing mRNAs	No direct role known prior to this study
Ada5	SAGA complex; histone acetylation	Required for HAC1u splicing during UPR; interacts with Ire1
Sec12	GEF required for COPII formation in ER-to-Golgi transport	No direct role known prior to this study
Kar2	ER ATPase; protein folding chaperone	Transcription activated by Hac1
Ero1	Thiol oxidase; protein folding in the ER	Transcription activated by Hac1
Pdi1	Protein disulfide isomerase; disulfide bond formation in the ER	Transcription activated by Hac1
